# Supplementary material for: Metabolic Risk Factors for Hepatocellular Carcinoma in Patients with Nonalcoholic Fatty Liver Disease: A Prospective Study
Source: Cancers (Basel). 2022 Dec 17;14(24):6234. doi: 10.3390/cancers14246234 (PMC9777437; doi:10.3390/cancers14246234)
Supplement: Supplementary file 1 [file cancers-14-06234-s001.zip › cancers-2019732-supplementary.pdf]

# Supplementary Materials: Metabolic Risk Factors for Hepatocellular Carcinoma in Patients with Nonalcoholic Fatty Liver Disease: A Prospective Study

Samuel O. Antwi, Emily C. Craver, Yvonne A. Nartey, Kurt Sartorius and Tushar Patel

**Table S1.** International Classification of Diseases, ninth and tenth revisions, Clinical Modification (ICD-9-CM and ICD-10-CM) codes used in the study.

| Condition                                                                                                  | ICD-9 codes                                       | ICD-10 codes                                                                                          |
|------------------------------------------------------------------------------------------------------------|---------------------------------------------------|-------------------------------------------------------------------------------------------------------|
| <i>Included Conditions</i>                                                                                 |                                                   |                                                                                                       |
| Non-alcoholic fatty liver Disease (NAFLD)                                                                  | 571.8                                             | K76.0                                                                                                 |
| Any cirrhosis                                                                                              | 571.5, 456.1, 456.21, 456.0, 456.20, 789.5, 572.2 | K74.6, I85.9, I98.2, I86.4, I85.0, I98.3, R18                                                         |
| <i>Excluded Conditions</i>                                                                                 |                                                   |                                                                                                       |
| Alcoholic liver disease (ALD)                                                                              | 571.0-571.3                                       | K70                                                                                                   |
| Alcoholic use disorder /alcohol abuse                                                                      | 291.0-291.3, 291.5, 291.8, 291.9, 303.x, 305.0    | F10                                                                                                   |
| Somatic consequences of alcohol                                                                            | 291, 357.5, 425.5, 535.3, 980.1, 980.9            | E24.4, G62.1, I42.6, K29.2, G31.2, G72.1, K85.2, K86.0, T51.0, T51.9, Y57.3, X65, Z50.2, Z71.4, Z72.1 |
| Viral hepatitis B and C                                                                                    | 070.xx, V0261, V02.62                             | B16, B17, B18, B19                                                                                    |
| Autoimmune liver disease (autoimmune hepatitis, primary biliary cirrhosis, primary sclerosing cholangitis) | 571.6, 576.1                                      | K83.0A, K83.0F, K74.3, K75.4                                                                          |
| Hemochromatosis                                                                                            | 275.0                                             | E83.1                                                                                                 |
| Wilson's disease                                                                                           | 275.1                                             | E83.0B                                                                                                |
| Alpha-1-antitrypsin deficiency                                                                             | 277.6                                             | E88.0A, E88.0B                                                                                        |
| Budd-Chiari syndrome                                                                                       | 453.0                                             | I82.0, K76.5                                                                                          |
| Chronic hepatitis, unspecified                                                                             | 571.4                                             | K73.9, K73.2                                                                                          |
| Secondary or unspecified biliary cirrhosis                                                                 | 571.6                                             | K74.4, K74.5                                                                                          |
| Drug use disorders (except nicotine and caffeine)                                                          | 305.1-9                                           | F11-F14, F16, F18, F19                                                                                |
| Biliary cirrhosis                                                                                          | 571.6                                             | K74.3                                                                                                 |
| <i>Variables</i>                                                                                           |                                                   |                                                                                                       |
| Diabetes mellitus                                                                                          | 250.xx                                            | E10.x-E14.x                                                                                           |
| Obesity                                                                                                    | 278.0, 278.1, 278.01, 278.00                      | E66.x                                                                                                 |
| Dyslipidemia                                                                                               | 272.0, 272.1, 272.2, 272.4, 272.5, 272.7, 272.9   | E78.0, E78.2, E78.4, E78.41, E78.49, 78.5.                                                            |
| Hypertension                                                                                               | 401.x, 402.x, 403.x, 404.x, 405.x                 | I10.x, I11.x-I13.x, I15.x                                                                             |
| Hypothyroidism                                                                                             | 240.9, 243.x, 244.x, 246.1, 246.8                 | E00.x-E03.x, E89.0                                                                                    |
| Smoking history/tobacco use                                                                                | V15.82, 305.1, 989.84                             | Z72.0, Z87.891                                                                                        |

ICD-codes for selection of the inclusion and exclusion criteria, and well as the metabolic conditions were obtained from Hagström H, Adams LA, Allen AM, et al. Administrative Coding in Electronic Health Care Record-Based Research of NAFLD: An Expert Panel Consensus Statement. Hepatology 2021;74(1):474-482. Other ICD codes for SEER covariates data, e.g., smoking and hypertension, were based on codes from Welzel TM, Graubard BI, Zeuzem S, El-Serag HB, Davila JA, McGlynn KA. Metabolic syndrome increases the risk of primary liver cancer in the United States: a study in the SEER-Medicare database. Hepatology. Aug 2011;54(2):463-71; and Kanwal F, Kramer JR, Mapakshi S, et al. Risk of Hepatocellular Cancer in Patients with Non-Alcoholic Fatty Liver Disease. Gastroenterology. Dec 2018;155(6):1828-1837.e2.
